# Unraveling the Myths of $R_0$ in Controlling the Dynamics of COVID-19 Outbreak: a Modelling Perspective

Mohd Hafiz Mohd, Fatima Sulayman

School of Mathematical Sciences, Universiti Sains Malaysia, 11800 USM, Penang, Malaysia.

**ABSTRACT:** COVID-19 is an emerging and rapidly evolving pandemic around the world, which causes severe acute respiratory syndrome and results in substantial morbidity and mortality. To examine the transmission dynamics of COVID-19 and its interactions with some exogenous factors such as limited medical resources and false detection problems, we employ a simple epidemiological model and analyse this system using modelling and dynamical systems techniques. We discover some contrasting findings with respect to the observations of basic reproduction number, and we investigate how the issues of limited medical resources and false detection problems affect the COVID-19 pandemic outbreak.

**KEYWORDS:** SIRS epidemic model; limited medical resources; false detection; alternative stable states; bifurcation

## 1. INTRODUCTION

Recently, a novel coronavirus called SARS-CoV-2 (or previously referred to as 2019-nCoV) has been identified as the causes of a severe acute respiratory syndrome and a cluster of pneumonia cases in Wuhan, China<sup>1,2</sup>. This virus rapidly spreads throughout China, followed by increasing number of cases across the globe, which lead to pandemic outbreaks in different countries such as United States, Italy, Malaysia<sup>2</sup>. The World Health Organization terms the disease associated with SARS-CoV-2 virus as COVID-19, which refers to coronavirus disease 2019.

In curbing the COVID-19 pandemic in Malaysia, the government through its Ministry of Health has announced a targeted testing approach so as to optimally use the country's limited medical resources<sup>3</sup>. In targeted testing, the tests are conducted based on location of COVID-19 hotspots and high-risk groups only<sup>3</sup>. However, this approach has been questioned by some medical practitioners<sup>4</sup>, which reckon that Malaysia should conduct COVID-19 testings as wide as possible (i.e., mass testing) so that these tests would be able to pick up most (if not all) of the possible cases; this crucial information can help government to devise an effective contact tracing strategy, and these possible patients could be placed on 14-day quarantine to contain the spread of the disease.

Motivated by the aforementioned problem, we utilise a simple epidemiological system with limited medical

**NOTE: This preprint reports new research that has not been certified by peer review and should not be used to guide clinical practice.**

2

27 resources component, which results in the possibility of under-testing issue. Inspired by the previous reports<sup>5,6</sup>,  
28 the problem of false detection (i.e., false negative tests) and the possibility of ‘reinfection’ are also investigated  
29 by employing our Susceptible-Infected-Removed-Susceptible (SIRS)-type system, based on daily reported  
30 cases in Malaysia, which is used as a case study.

## 2. MODEL AND METHODS

31 To model the combined effects of limited medical resources and false detection problems in shaping the COVID-  
32 19 pandemic, we revisit a simple ordinary differential equation (ODE) model of SIRS-type<sup>7-10</sup>:

$$\frac{dS}{dt} = \mu N - \frac{\beta SI}{N} + \varepsilon R - \nu S$$

$$\frac{dI}{dt} = \frac{\beta SI}{N} - (\gamma + \nu) I - \frac{\alpha I}{\omega + I} \quad (1)$$

$$\frac{dR}{dt} = \gamma I + \frac{\alpha I}{\omega + I} - (\varepsilon + \nu) R$$

34 where population of  $N$  individuals are divided into three compartments:  $S(t)$  corresponds to susceptible  
35 population, which can be infected (with transmission rate of  $\beta$ );  $I(t)$  corresponds to the number of infectious  
36 individuals and  $R(t)$  corresponds to the removal class where those individuals who have recovered (with  
37 recovery rate of  $\gamma$ ) or dead are removed from the population. The parameters  $\mu$  and  $\nu$  correspond to the birth  
38 and death rates of the population, respectively. To investigate the impacts of false detection on COVID-19  
39 transmission dynamics, we allow for some proportions of individuals from the removal compartment to re-enter  
40 the susceptible class (at a transfer rate of  $\varepsilon$ ); this component is also used as a proxy to account for the likelihood  
41 of ‘reinfection’: it has been reported that, until this research work is conducted, we do not know whether some  
42 of the COVID-19 patients who have recovered are truly been ‘reinfected’, or, at the time of their ‘recovery’,  
43 they still had low levels of the virus in their systems<sup>5</sup>. There is also no evidence whether people have herd  
44 or long-term immunity against this new coronavirus attack<sup>6</sup>. Another concern in controlling this pandemic is  
45 about the issue of under-testing for COVID-19, which is evident in some developing countries; this situation  
46 occurs due to limited medical resources such as tests, drugs and hospital beds<sup>3,11,12</sup>. To study the consequence  
47 of the limited medical resources on the spread of COVID-19 outbreak, we employ the term of  $\frac{\alpha I}{\omega + I}$ , which is  
48 motivated by Zhou and Fan<sup>9</sup>: the parameter  $\alpha \geq 0$  represents the medical resources supplied per unit time and  
49  $\omega > 0$  corresponds to half-saturation constant, which measures the efficiency of the medical resource supply  
50 (i.e., if  $\omega$  is smaller, then the efficiency is higher). In fact, this quantity also represents the efficiency of the  
51 supply of available medical resources, and this situation would also depend on other factors such as the control

52 strategies (e.g., quarantine, movement control order) and the production of drugs, etc. All of the parameters are  
53 positive in this model to depict the biologically-meaningful phenomenon of transmission dynamics.

54 The model (1) has two types of steady states, which are disease-free and pandemic equilibria: (i) disease-  
55 free equilibrium,  $(\frac{\mu N}{\nu}, 0, 0)$ ; (ii) pandemic equilibrium,  $(S^*, I^*, R^*)$ . Local stability analysis is employed so as  
56 to determine stability of each of these steady states. To obtain basic reproduction numbers,  $R_0$ , we used the next  
57 generation matrix method (and the correctness of these quantities are checked using eigenvalues analysis). The  
58 simplest SIR system can be obtained from the model (1) by letting  $\mu = \nu = \varepsilon = \alpha = 0$ , with basic reproduction  
59 number,  $R_{0S}$ , is as follows:

$$60 \quad R_{0S} = \left( \frac{\beta}{\gamma} \right). \quad (2)$$

61 When the possibility of limited medical resources is relaxed (i.e.,  $\alpha = 0$  and other parameters are positive),  
62 basic reproduction number,  $R_{0u}$ , is given by:

$$63 \quad R_{0u} = \left( \frac{\beta \mu}{\nu(\gamma + \nu)} \right). \quad (3)$$

64 Considering the case of a limited medical resources (i.e.,  $\alpha > 0$ ), this situation leads to different threshold of  
65 basic reproduction number,  $R_{0L}$ :

$$66 \quad R_{0L} = \left( \frac{\omega(\beta \mu - (\nu(\gamma + \nu)))}{\alpha \nu} \right). \quad (4)$$

67 Numerical simulations are conducted for the model (1) and the results are discussed in the next sections. As a  
68 case study, the transmission dynamics are investigated using daily confirmed cases in Malaysia, where some of  
69 the parameters are estimated based on the fitting of the model (1) to COVID-19 cases in the interval between  
70 March 24 and April 23, 2020<sup>13</sup>. Unless otherwise stated, parameter values used in the simulation are given in  
71 figure captions. In all cases, we employed numerical simulation using MATLAB `ode15s` solver. We also used  
72 numerical continuation package XPPAUT to perform one- and two-parameter bifurcation analysis; the stable  
73 and unstable steady states are tracked as a model parameter changes.

### 3. RESULTS AND DISCUSSIONS

74 First, we consider a simple scenario shown by Fig. 1A where the assumption of limited medical resources  
75 is relaxed (i.e.,  $\alpha = 0$ ) and there is no possibility of false detection or ‘reinfection’ (i.e.,  $\varepsilon = 0$ ) in this  
76 epidemiological system. This situation corresponds to the dynamics of basic SIR model (solid lines) with  
77  $R_{0S} = 2.7586$ : we observe that the active cases increase on daily basis until the infection curve (solid red)

4

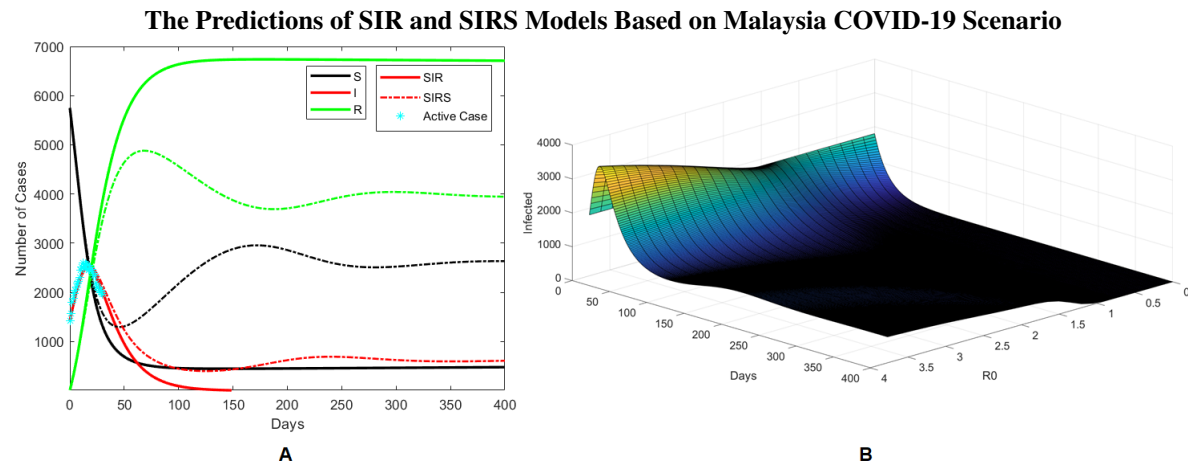

**Fig. 1** Numerical simulation results of SIR ( $\varepsilon = \alpha = 0$ ) and SIRS ( $\varepsilon > 0, \alpha = 0$ ) models with the assumption of limited medical resources is relaxed. (A) Time series results of SIR (solid lines) and SIRS (dashed lines) models and comparison with the number of active cases in Malaysia (cyan asterick). (B) The daily number of active cases in Malaysia as  $R_{0u}$  varies based on predictions of SIRS model: as  $R_{0u} < 1$ , the pandemic can be excluded; when  $R_{0u} > 1$ , the pandemic persists for a long period of time. Other parameter values:  $\beta = 0.16$  (fitted),  $\gamma = 0.058$  (fitted),  $\mu = \nu = 0.00002^{14}$ ,  $N = S + I + R$  and  $\varepsilon = 0.0009$  (fitted).

78 peaks around first week of April; this observation is in agreement with the number of reported active COVID-  
 79 19 cases in Malaysia (cyan asterick), which peaks around April 5-8, 2020 with the highest 2596 active cases  
 80 recorded on April 5. Consequently, the number of active cases start to decrease and SIR model predicts that  
 81 infection will be excluded in the long run.

82 The predictions of SIR represents an ‘ideal’ situation, assuming medical resources to fight this pandemic  
 83 are being allocated enough, apart from citizens have been screened massively and detected (i.e., quarantined)  
 84 quickly; additionally, it is also assumed that the test results are reliable and can be trusted. In reality, some  
 85 nations especially the developing countries (e.g., Malaysia, Vietnam, etc.), face the risk of under-screening due  
 86 to limited medical resources, and also the possibility of false detection. To illustrate the impacts of inaccurate  
 87 detection or ‘reinfection’ problem using SIRS system (1), we let  $\varepsilon > 0$  (keeping  $\alpha = 0$ ) and the results  
 88 are plotted in Fig. 1A (dashed lines). In comparison to our previous predictions of COVID-19 transmission  
 89 dynamics in Malaysia, we realise that SIR and SIRS observations are indistinguishable before the infection  
 90 peak; after the infected trajectories reach the peak point, SIRS results show worst-case scenario with increasing  
 91 number of infectious (dashed red) and susceptible (dashed black) individuals; in this case, SIRS demonstrates  
 92 that the pandemic will persist for a long time. This is in agreement with our analysis of basic reproduction  
 93 number:  $R_{0u}$  is calculated to be 2.7577 using equation (3) for Malaysia’s COVID-19 scenario (in practice,  
 94  $R_{0u} > 1$  implies a pandemic outbreak). In order to control this pandemic, it is vital to employ proper mitigation  
 95 measures such as quarantine, travel restrictions and social distancing; these strategies can help to push  $R_{0u}$  to

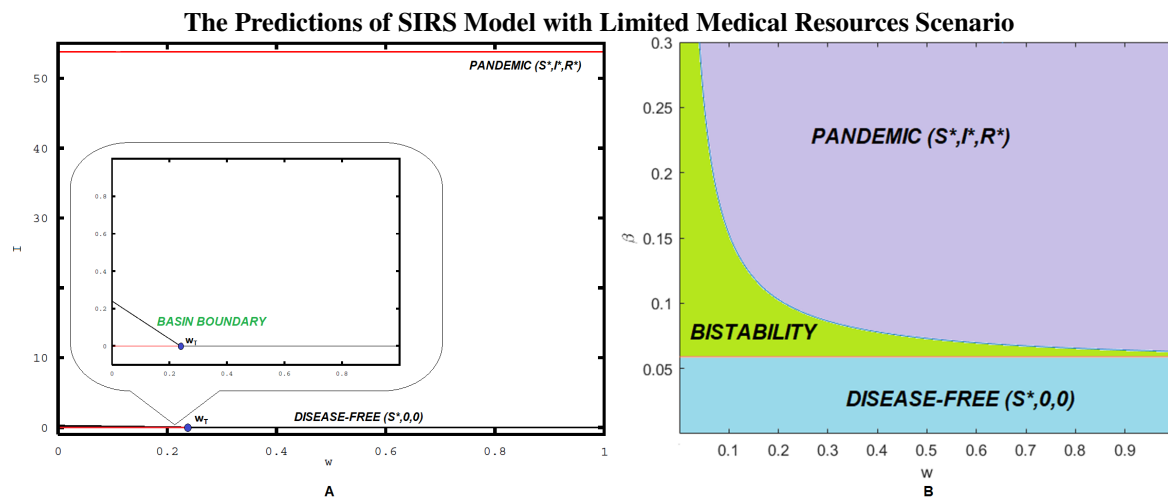

**Fig. 2** Bifurcation analysis results of the model (1) with limited medical resources and possibility of false detection. (A) A one-parameter bifurcation diagram when  $\beta = 0.095$  as  $\omega$  varies with threshold  $\omega_T$  represents transcritical bifurcation (blue point). (B) A two-parameter bifurcation diagram in  $(\omega, \beta)$ -plane with different colour regions represent transmission dynamics of the system. Other parameter values:  $\mu = \nu = 0.00002^{14}$ ,  $N = S + I + R$ ,  $\varepsilon = 0.0009$  (fitted),  $\gamma = 0.053$  (fitted) and  $\alpha = 0.01^9$ .

96 be less than 1, which in principle can eradicate this pandemic in a long run (Fig. 1B).

97 However, the use of basic reproduction number should be interpreted with care in managing the deadly  
 98 and fast evolving pandemic outbreaks such as COVID-19. Other counterintuitive observations are also possible  
 99 even when  $R_0 < 1$ . To illustrate this observation, we consider our SIRS model with limited medical resources  
 100 scenario (i.e.,  $\varepsilon > 0$  and  $\alpha > 0$ ). Fig. 2A depicts an example of bifurcation analysis of the model (1) with  
 101  $\beta = 0.095$  and  $\varepsilon = 0.0009$  as the efficiency of the medical resource supply ( $\omega$ ) is varied. There occurs one  
 102 critical value i.e.,  $\omega_T$ , which corresponds to transcritical bifurcation (blue point). From an epidemiological  
 103 viewpoint,  $\omega_T$  is a minimum threshold of medical resource supply to ensure the infection dynamics can be  
 104 reduced efficiently and effectively. There are also several branches of steady states: (i) the upper branch  
 105 (pandemic equilibrium) is always stable (red curve); (ii) lower branch (disease-free equilibrium) can be stable  
 106 (red curve) or unstable (black curve), depending on the values of  $\omega$ . When  $\omega < \omega_T$ , we observe the occurrence  
 107 of alternative stable states, with both pandemic and disease-free equilibria are stable; convergence to either one  
 108 of these steady states depends on initial abundances of individuals in susceptible, infected and removal classes.  
 109 When  $\omega > \omega_T$ , this situation leads to rapidly evolving pandemic outbreaks. Closer examination of these  
 110 outcomes reveals that  $R_{0L}$  of SIRS model (1) with limited medical resources scenario is 0.8396 (calculated  
 111 using equation (4)) when  $\omega < \omega_T$ . While basic reproduction number is less than 1 in this case, it is observed  
 112 that the COVID-19 pandemic is still likely to occur due to a relatively small basin of attractions of disease-  
 113 free equilibrium (lower branch steady state), which can cause a catastrophic shift to pandemic equilibrium (upper

6

114 branch steady state). In general, the two bistable attractors are separated by a basin boundary (unstable pandemic  
115 equilibrium), which determines the long-term dynamics of this epidemiological system.

116 Based on equation (4), we also notice some mechanisms that can result in  $R_{0L}$  to be shifted to larger values:  
117 (i) higher magnitudes of  $\omega$  indicate inefficiency or lack of medical resource supply, which consequently could  
118 lead to pandemic outbreaks; (ii) as the transmission rate,  $\beta$ , is higher, the pace of pandemic spread increases  
119 significantly. To demonstrate these mechanisms, we plotted a two-parameter bifurcation diagram in Fig. 2B as  
120  $\omega$  and  $\beta$  are varied. The blue and red curves correspond to transcritical bifurcations, and the interaction between  
121 these two local bifurcations determine the dynamical behaviours of this epidemiological system and separate the  
122 parameter space into three different regions: (i) purple region corresponds to pandemic equilibrium; (ii) cyan  
123 region corresponds to disease-free equilibrium; (iii) green region corresponds the appearance of alternative  
124 stable states between pandemic and disease-free outcomes. We can see that an increase in  $\omega$  and  $\beta$  will  
125 dramatically increase  $R_{0L}$ , and this situation can be detrimental in controlling the negative impacts of COVID-  
126 19, as more outcomes of pandemic outbreak are possible.

#### 4. CONCLUSION

127 In this study, the most important case that we identified is the possibility of a COVID-19 pandemic through  
128 bistable behaviour, even when the basic reproduction number is less than unity. This scenario is observed when  
129 certain complexities such as limited medical resources and false detection problems are incorporated into the  
130 model, which make the epidemiological system to be more realistic. Based on these findings, we caution policy  
131 makers not to make their decisions solely based on the guidance of the basic reproduction number only, which  
132 clearly courting trouble. This is because other factors such as alternative stable states phenomenon can interfere  
133 with distinct epidemiological forces and lead to catastrophic shifts in transmission dynamics. We recommend  
134 for the existing policies in Malaysia e.g., movement control order, quarantine and social distancing to be further  
135 practiced so as to break the chain of infections and flatten the infection curve, given the country's limited  
136 medical resources scenario and other pressing issues such as the risk of under-screening. Careful consideration  
137 of these issues will minimise spurious conclusions and maximise the amount of knowledge extracted from our  
138 modelling practices, which can also promote an evidence-based decision making in public health sector.

#### 139 Acknowledgement

140 This research is supported by the Universiti Sains Malaysia (USM) Fundamental Research Grant Scheme  
141 (FRGS) No. 203/PMATHS/6711645. The authors would like to thank Dr. Kamarul Imran Musa and Dr.  
142 Wan Nor Arifin for many fruitful discussions on the situation of COVID-19 pandemic in Malaysia.

## REFERENCES

- 143 1. Huang Y, Yang L, Dai H, Tian F, Chen K (2020) Epidemic situation and forecasting of COVID-19 in and outside China.  
144 *Bull World Health Organ* .
- 145 2. Li R, Pei S, Chen B, Song Y, Zhang T, Yang W, Shaman J (2020) Substantial undocumented infection facilitates the  
146 rapid dissemination of novel coronavirus (SARS-COV 2). *Science*.
- 147 3. Annuar A (2020) Targeted testing better use of resources in covid-19 fight,  
148 says Health DG. *Malay Mail* . [[https://www.malaymail.com/news/malaysia/2020/04/13/  
149 targeted-testing-better-use-of-resources-in-covid-19-fight-says-health-d-g/1856325](https://www.malaymail.com/news/malaysia/2020/04/13/targeted-testing-better-use-of-resources-in-covid-19-fight-says-health-d-g/1856325)]
- 150 4. Nordin MM, Ismail Z (2020) Malaysia must ramp up testing. *The Star* . [[https://www.malaymail.com/news/malaysia/  
151 2020/04/13/targeted-testing-better-use-of-resources-in-covid-19-fight-says-health-d-g/1856325](https://www.malaymail.com/news/malaysia/2020/04/13/targeted-testing-better-use-of-resources-in-covid-19-fight-says-health-d-g/1856325)]
- 152 5. Malkov E (2020) Covid-19 in the us: Estimates of scenarios with possibility of reinfection. *Available at SSRN 3569097*.
- 153 6. Shi Y, Wang Y, Shao C, Huang J, Gan J, Huang X, Bucci E, Piacentini M, et al (2020), Covid-19 infection: the  
154 perspectives on immune responses. *Cell Death & Differentiation*.
- 155 7. Kermack WO, McKendrick AG (1927) A contribution to the mathematical theory of epidemics. *Proceedings of the  
156 Royal Society of London Series A* **115**, 700–721.
- 157 8. Hethcote HW (2000) The mathematics of infectious diseases. *SIAM Review* **42**, 599–653.
- 158 9. Zhou L, Fan M (2012) Dynamics of an SIR epidemic model with limited medical resources revisited. *Nonlinear Analysis  
159 Real World Applications* **13**, 312–324.
- 160 10. Muroya Y, Li H, Kuniya T (2014) Complete global analysis of an SIRS epidemic model with graded cure and incomplete  
161 recovery rates. *Journal of Mathematical Analysis and Applications* **410**, 719–732.
- 162 11. Rokx C, Schieber G, Harimurti P, Tandon A, Somanathan A (2004) Health Financing in Indonesia. *The World Bank*.
- 163 12. Hermawan A (2020) With limited testing capability, Indonesia may battle COVID-  
164 19 blindfolded. *The Jakarta Post* . [[https://www.thejakartapost.com/academia/2020/04/18/  
165 with-limited-testing-capability-indonesia-may-battle-covid-19-blindfolded.html](https://www.thejakartapost.com/academia/2020/04/18/with-limited-testing-capability-indonesia-may-battle-covid-19-blindfolded.html)]
- 166 13. MOH (2020) Press statement updates on COVID-19 situation in Malaysia. *Ministry of Health Malaysia* .
- 167 14. Mummert A, Otunuga OM (2019) Parameter identification for a stochastic seirs epidemic model: case study influenza.  
168 *Journal of Mathematical Biology* **79**, 705–729.
- 169
